# Supplementary material
Source: MDPI journal article supplement (https://www.mdpi.com/2311-5637/9/12/1024)
Supplement: s1 [file s1]

## Supplementary

# Growth, Substrate, and Metabolite Changes of Probiotic *Bifidobacterium animalis* subsp. *lactis* in Soy (Tofu) Whey

Ricco Tindjau <sup>1</sup>, Jian-Yong Chua <sup>1,\*</sup> and Shao-Quan Liu <sup>1,2,\*</sup>

<sup>1</sup> Department of Food Science and Technology, National University of Singapore, 2 Science Drive 2, Singapore 117542, Singapore

<sup>2</sup> National University of Singapore (Suzhou) Research Institute, Suzhou Industrial Park, 377 Lin Quan Street, Suzhou215213, China

\* Correspondence: jianyong.chua@nus.edu.sg (J.-Y.C.); fstlsq@nus.edu.sg (S.-Q.L.);  
Tel.: +65-6516-2687 (S.-Q.L.); Fax: +65-6775-7895 (S.-Q.L.)

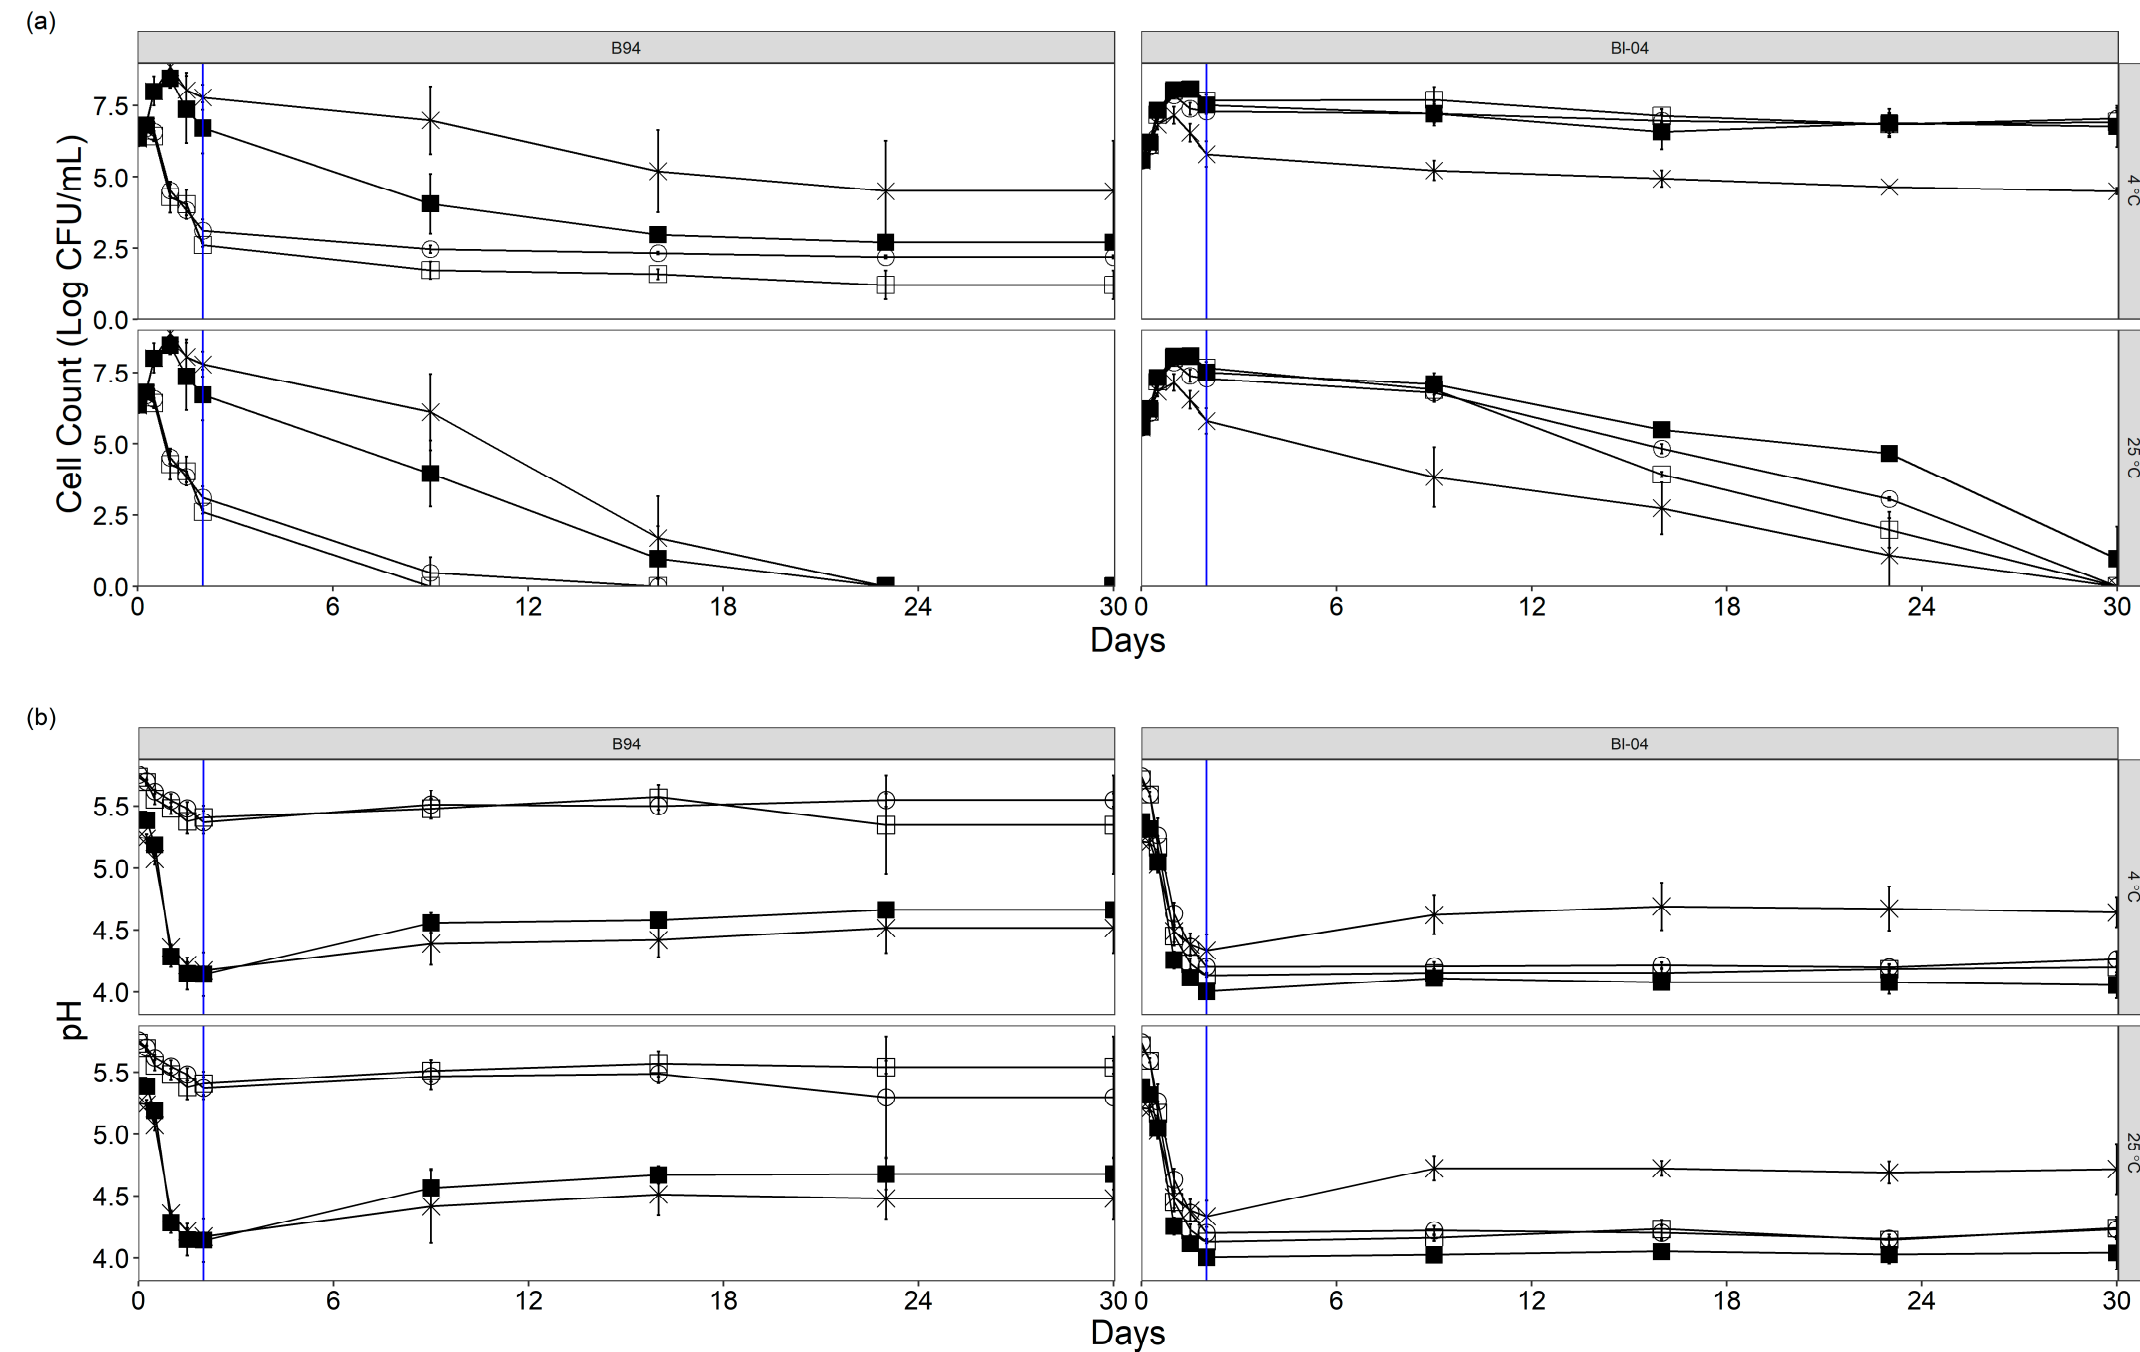

**Figure S1.** Changes of (a) cell count, and (b) pH of *B. lactis* BI-04 or B94 fermented soy whey stored for 4 weeks at ambient (25 °C) or chilled (4 °C) temperature. Blue line represents 48-h fermentation at 37 °C. ○ CN = control, □ G = glucose supplemented, × GC = glucose and cysteine supplemented, ■ GCY = glucose, cysteine, and yeast extract supplemented.

**Table S1.** Free amino acids of soy whey before and after *B. lactis* BI-04 or B94 fermentation.

|                                           | CN                 |                |                 | G                  |                 |                 | GC                 |                 |                   | GCY                |                  |                   |
|-------------------------------------------|--------------------|----------------|-----------------|--------------------|-----------------|-----------------|--------------------|-----------------|-------------------|--------------------|------------------|-------------------|
|                                           | T 0 h <sup>‡</sup> | T 48 h BI-04   | T 48 h B94      | T 0 h <sup>‡</sup> | T 48 h BI-04    | T 48 h B94      | T 0 h <sup>‡</sup> | T 48 h BI-04    | T 48 h B94        | T 0 h <sup>‡</sup> | T 48 h BI-04     | T 48 h B94        |
| <b>Amino acids (mg/L)</b>                 |                    |                |                 |                    |                 |                 |                    |                 |                   |                    |                  |                   |
| Aspartic acid <sup>*</sup>                | 6.42 ± 0.10b       | 0.29 ± 0.17c   | 6.43 ± 0.31b    | 5.53 ± 0.50b       | 0.26 ± 0.05c    | 6.66 ± 0.14b    | 4.78 ± 0.33b       | 2.81 ± 0.88bc   | 0.44 ± 0.02c      | 28.4 ± 7.25a       | 27.39 ± 1.52a    | 25.63 ± 3.42a     |
| Threonine <sup>*</sup>                    | 5.93 ± 0.18def     | 4.2 ± 0.65ef   | 6.48 ± 0.06def  | 5.40 ± 0.53def     | 3.62 ± 0.61f    | 6.13 ± 0.09def  | 4.11 ± 0.68f       | 8.27 ± 0.76d    | 7.27 ± 1.69de     | 29.18 ± 1.76c      | 38.39 ± 1.70a    | 34.55 ± 2.86b     |
| Serine <sup>*</sup>                       | 5.62 ± 0.80c       | 0.58 ± 0.16d   | 6.15 ± 0.25c    | 5.22 ± 0.56c       | 0.60 ± 0.25d    | 5.88 ± 0.26c    | 4.73 ± 0.47c       | 5.61 ± 0.36c    | 6.09 ± 1.22c      | 35.18 ± 2.42b      | 35.11 ± 3.69b    | 41.4 ± 3.28a      |
| Asparagine + glutamic acid <sup>‡*®</sup> | 22.08 ± 0.48b      | 4.26 ± 0.19d   | 20.43 ± 0.85b   | 20.86 ± 2.33b      | 3.54 ± 0.46d    | 20.67 ± 0.33b   | 18.5 ± 0.73bc      | 16.56 ± 1.7bc   | 10.06 ± 0.80cd    | 101.34 ± 4.38a     | 97.84 ± 6.49a    | 91.94 ± 11.09a    |
| Glycine <sup>‡*</sup>                     | 5.93 ± 0.22d       | 2.65 ± 0.07e   | 6.75 ± 0.19d    | 5.68 ± 0.76d       | 2.37 ± 0.29e    | 6.36 ± 0.25d    | 5.37 ± 0.35d       | 7.46 ± 0.28d    | 6.73 ± 0.50d      | 24.31 ± 2.34c      | 31.69 ± 1.20a    | 29.05 ± 1.83b     |
| Alanine <sup>*</sup>                      | 24.00 ± 1.37d      | 4.10 ± 1.16f   | 24.97 ± 0.97d   | 22.16 ± 2.81d      | 2.43 ± 0.25f    | 23.21 ± 0.84d   | 21.49 ± 1.66d      | 12.67 ± 2.25e   | 11.54 ± 0.85e     | 85.47 ± 2.44a      | 65.62 ± 4.79c    | 79.16 ± 5.19b     |
| Valine <sup>‡*®</sup>                     | 26.33 ± 1.04c      | 10.21 ± 0.28d  | 24.13 ± 0.52c   | 24.39 ± 2.38c      | 7.13 ± 0.84d    | 23.4 ± 0.58c    | 24.88 ± 1.63c      | 21.67 ± 1.11c   | 22.63 ± 1.64c     | 60.78 ± 5.37b      | 59.67 ± 1.93b    | 70.19 ± 4.45a     |
| Cysteine <sup>‡*®</sup>                   | 1.38 ± 0.14e       | 1.30 ± 0.09e   | 1.32 ± 0.07e    | 1.04 ± 0.19e       | 1.03 ± 0.17e    | 1.19 ± 0.08e    | 116.04 ± 17.31ab   | 95.11 ± 2.55cd  | 87.11 ± 5.72d     | 124.83 ± 10.91a    | 98.56 ± 6.56cd   | 107.87 ± 1.41bc   |
| Cystathionine <sup>‡*®</sup>              | 0.90 ± 0.20fg      | 1.47 ± 0.17ef  | 0.34 ± 0.06g    | 0.80 ± 0.17g       | 1.61 ± 0.20e    | 0.42 ± 0.07g    | 1.67 ± 0.27de      | 2.31 ± 0.38bcd  | 3.13 ± 0.16a      | 2.76 ± 0.46ab      | 2.10 ± 0.44cde   | 2.75 ± 0.28abc    |
| Methionine <sup>*®</sup>                  | 4.40 ± 0.25cd      | 1.04 ± 0.08fg  | 4.31 ± 0.09cd   | 4.16 ± 0.34cd      | 1.00 ± 0.21g    | 4.20 ± 0.08cd   | 5.06 ± 0.15c       | 3.42 ± 0.47de   | 2.57 ± 0.19ef     | 16.57 ± 1.34a      | 14.78 ± 0.56b    | 14.75 ± 1.46b     |
| Isoleucine <sup>*®</sup>                  | 5.18 ± 0.18cd      | 0.48 ± 0.06f   | 4.99 ± 0.05cde  | 4.80 ± 0.40cde     | 0.20 ± 0.07f    | 4.88 ± 0.13cde  | 6.78 ± 0.46c       | 1.69 ± 0.45ef   | 2.23 ± 0.1def     | 36.09 ± 2.35b      | 35.26 ± 1.54b    | 43.75 ± 3.77a     |
| Leucine <sup>‡*®</sup>                    | 7.44 ± 0.22c       | 1.5 ± 0.05de   | 8.27 ± 0.1c     | 6.89 ± 0.55cd      | 0.80 ± 0.11e    | 7.98 ± 0.11c    | 8.35 ± 0.21c       | 4.28 ± 0.66cde  | 4.09 ± 0.81cde    | 63.37 ± 3.84a      | 55.73 ± 2.11b    | 64.12 ± 6.53a     |
| Tyrosine <sup>‡*®</sup>                   | 17.05 ± 1.78c      | 3.74 ± 0.12de  | 16.27 ± 0.28c   | 15.02 ± 1.02c      | 2.24 ± 0.57e    | 15.69 ± 0.26c   | 16.57 ± 0.95c      | 8.45 ± 1.86d    | 5.67 ± 1.27de     | 56.19 ± 3.36a      | 48.72 ± 2.13b    | 52.19 ± 4.88ab    |
| Phenylalanine <sup>+</sup>                | 1.28 ± 0.20a       | 1.84 ± 2.50a   | 1.12 ± 0.03a    | 1.07 ± 0.16a       | 0.66 ± 0.24a    | 1.09 ± 0.08a    | 1.64 ± 0.21a       | 1.45 ± 0.36a    | 1.52 ± 0.35a      | 1.02 ± 0.11a       | 1.03 ± 0.13a     | 1.43 ± 0.17a      |
| Homocysteine <sup>‡*®</sup>               | 182.16 ± 2.40c     | 108.29 ± 1.72d | 194.1 ± 7.3c    | 175.59 ± 15.48c    | 91.04 ± 9.69d   | 196.16 ± 6.25c  | 187.46 ± 7.97c     | 198.36 ± 8.71c  | 187.96 ± 20.81c   | 309.17 ± 11.36a    | 270.94 ± 8.1b    | 269 ± 11.76b      |
| Histidine <sup>‡*®</sup>                  | 5.81 ± 0.11c       | 2.87 ± 0.84d   | 6.88 ± 0.18c    | 5.83 ± 0.53c       | 2.55 ± 0.40d    | 6.75 ± 0.15c    | 6.81 ± 0.26c       | 6.21 ± 0.32c    | 5.68 ± 0.57c      | 15.91 ± 0.7b       | 17.87 ± 0.58a    | 18.79 ± 1.23a     |
| Lysine <sup>*</sup>                       | 12.10 ± 0.35c      | 7.18 ± 0.14de  | 15.39 ± 0.19c   | 11.21 ± 1.01cd     | 6.09 ± 0.73e    | 14.64 ± 0.22c   | 12.69 ± 0.73c      | 15.25 ± 0.04c   | 14.72 ± 0.98c     | 41.39 ± 4.13b      | 53.08 ± 2.07a    | 57.01 ± 3.19a     |
| Ammonium <sup>‡*®</sup>                   | 4.22 ± 0.52d       | 3.67 ± 0.96d   | 3.65 ± 0.51d    | 4.39 ± 1.31d       | 2.84 ± 0.48d    | 3.51 ± 0.41d    | 6.93 ± 1.13c       | 13.3 ± 0.91b    | 11.92 ± 1.03b     | 7.22 ± 0.57c       | 15.68 ± 1.78a    | 11.77 ± 0.53b     |
| Arginine <sup>‡*</sup>                    | 73.14 ± 1.91b      | 0.76 ± 0.07d   | 74.53 ± 0.79b   | 67.88 ± 5.13bc     | 0.62 ± 0.13d    | 71.97 ± 0.27b   | 66.84 ± 3.42bc     | 63.66 ± 0.66c   | 63.59 ± 4.65c     | 93.11 ± 5.44a      | 7.06 ± 2.01d     | 99.64 ± 4.70a     |
| Proline <sup>*</sup>                      | 9.46 ± 0.42d       | 7.24 ± 0.77d   | 13.9 ± 0.37cd   | 9.41 ± 2.13d       | 6.56 ± 0.71d    | 13.00 ± 0.25cd  | 11.02 ± 0.64cd     | 19.83 ± 0.79c   | 14.33 ± 1.11cd    | 61.73 ± 11.65b     | 86.49 ± 3.50a    | 61.59 ± 3.8b      |
| <b>Total amino acids<sup>*®</sup></b>     | 502.24 ± 10.98de   | 210.61 ± 8.46f | 521.73 ± 9.17de | 476.09 ± 38.16e    | 175.27 ± 19.45f | 516.65 ± 6.37de | 613.23 ± 39.23c    | 582.62 ± 4.88cd | 544.56 ± 45.02cde | 1323.08 ± 66.85a   | 1218.39 ± 28.23b | 1305.21 ± 73.36ab |
| GABA (mg/L) <sup>‡*®</sup>                | 45.74 ± 2.02b      | 20.34 ± 2.26c  | 41.47 ± 0.93b   | 44.63 ± 2.79b      | 18.79 ± 3.17c   | 43.87 ± 1.59b   | 42.49 ± 2.14b      | 40.95 ± 1.78b   | 42.69 ± 2.72b     | 54.3 ± 2.42a       | 53.94 ± 2.12a    | 54.86 ± 4.47a     |

a-g Statistical analysis using ANOVA at 95% confidence interval with Tukey’s post hoc test across 8 treatments if interaction effect is significant.

<sup>\*</sup>Depicts a significant (*P*<0.05) bifidobacterial effect.

<sup>\*</sup>Depicts a significant (*P*<0.05) supplementation effect.

<sup>®</sup>Depicts a significant (*P*<0.05) interaction effect.

<sup>‡</sup>T 0 h, data taken from Tindjau et al. (2023) [19], as they were part of the same experiment.

CN = unsupplemented control, G = glucose supplementation, GC = Glucose and cysteine supplementation, GCY = Glucose, cysteine and yeast extract supplementation.

**Table S2.** Two-way ANOVA on soy whey free minerals before and after *B. lactis* BI-04 or B94 fermentation.

|                            | CN                 |                |                | G                  |               |                | GC                 |                |                 | GCY                |                |                |
|----------------------------|--------------------|----------------|----------------|--------------------|---------------|----------------|--------------------|----------------|-----------------|--------------------|----------------|----------------|
|                            | T 0 h <sup>†</sup> | T 48 h BI-04   | T 48 h B94     | T 0 h <sup>†</sup> | T 48 h BI-04  | T 48 h B94     | T 0 h <sup>†</sup> | T 48 h BI-04   | T 48 h B94      | T 0 h <sup>†</sup> | T 48 h BI-04   | T 48 h B94     |
| Minerals (mg/L)            |                    |                |                |                    |               |                |                    |                |                 |                    |                |                |
| Potassium <sup>++@</sup>   | 66.98 ± 0.1bc      | 67.88 ± 0.15b  | 66.1 ± 0.50bc  | 60.5 ± 0.15ef      | 59.03 ± 0.23f | 62.4 ± 0.32de  | 61.83 ± 0.15def    | 64.08 ± 0.3cd  | 61.48 ± 4.10def | 67.38 ± 0.23bc     | 71.2 ± 0.64a   | 68.65 ± 1.97ab |
| Sodium <sup>*</sup>        | 5.02 ± 0.05b       | 5.51 ± 0.06b   | 5.17 ± 1.39b   | 4.66 ± 0.04b       | 4.71 ± 0.05b  | 4.89 ± 1.30b   | 4.83 ± 0.05b       | 4.81 ± 0.05b   | 4.64 ± 1.16b    | 12.88 ± 0.05a      | 13.83 ± 1.16a  | 13.13 ± 1.13a  |
| Magnesium <sup>++@</sup>   | 92.63 ± 0.75a      | 94.08 ± 0.70a  | 90.50 ± 0.49ab | 83.78 ± 0.34cd     | 82.10 ± 0.53d | 85.50 ± 0.56cd | 84.98 ± 0.58cd     | 87.58 ± 0.72bc | 84.30 ± 4.69cd  | 83.7 ± 0.34cd      | 87.4 ± 1.21bc  | 84.13 ± 2.21cd |
| Iron <sup>++@</sup>        | 0.37 ± 0.02def     | 0.40 ± 0.01cd  | 0.25 ± 0.03h   | 0.35 ± 0.01f       | 0.36 ± 0.01ef | 0.24 ± 0.02h   | 0.30 ± 0.01g       | 0.40 ± 0.01c   | 0.39 ± 0.03cde  | 0.36 ± 0.01def     | 0.48 ± 0.01a   | 0.45 ± 0.02b   |
| Phosphorous <sup>++@</sup> | 139.5 ± 0.58d      | 117 ± 0.82gh   | 131.25 ± 0.50e | 128 ± 0.00ef       | 112.5 ± 0.58h | 128.5 ± 0.58ef | 129.25 ± 0.50ef    | 122.5 ± 1.00fg | 112.25 ± 6.24h  | 183.00 ± 0.00a     | 163.00 ± 6.33b | 154.00 ± 4.77c |
| Zinc <sup>++@</sup>        | 0.13 ± 0.00cd      | 0.13 ± 0.01c   | 0.13 ± 0.01de  | 0.12 ± 0.01e       | 0.12 ± 0.01e  | 0.12 ± 0.01de  | 0.13 ± 0.01cde     | 0.13 ± 0.01cde | 0.12 ± 0.01de   | 0.29 ± 0.01ab      | 0.29 ± 0.01a   | 0.29 ± 0.01b   |
| Copper <sup>++@</sup>      | 0.51 ± 0.01a       | 0.43 ± 0.01abc | 0.49 ± 0.05ab  | 0.47 ± 0.01abc     | 0.37 ± 0.01c  | 0.48 ± 0.05abc | 0.39 ± 0.01bc      | 0.13 ± 0.01e   | 0.19 ± 0.05de   | 0.40 ± 0.01bc      | 0.23 ± 0.09de  | 0.27 ± 0.09d   |
| Cobalt <sup>++@</sup>      | 0.04 ± 0.01a       | 0.04 ± 0.01b   | 0.04 ± 0.01ef  | 0.04 ± 0.01bc      | 0.03 ± 0.01f  | 0.03 ± 0.01f   | 0.04 ± 0.01cde     | 0.04 ± 0.01def | 0.03 ± 0.01g    | 0.04 ± 0.01a       | 0.04 ± 0.01b   | 0.04 ± 0.01bcd |
| Selenium <sup>++@</sup>    | 1.47 ± 0.01cde     | 1.40 ± 0.00ef  | 1.38 ± 0.01f   | 1.59 ± 0.01a       | 1.45 ± 0.01de | 1.56 ± 0.04ab  | 1.58 ± 0.04a       | 1.53 ± 0.05abc | 1.5 ± 0.06bcd   | 1.56 ± 0.01ab      | 1.51 ± 0.01bcd | 1.48 ± 0.04cd  |

a-f, Statistical analysis using ANOVA at 95% confidence interval with Tukey’s post hoc test across 8 treatments if interaction effect is significant.

<sup>†</sup>Depicts a significant (*P*<0.05) bifidobacterial effect.

<sup>\*</sup>Depicts a significant (*P*<0.05) supplementation effect.

<sup>@</sup>Depicts a significant (*P*<0.05) interaction effect.

<sup>†</sup>T 0 h, data taken from Tindjau et al. (2023) [19], as they were part of the same experiment.

CN = unsupplemented control, G = glucose supplementation, GC = Glucose and cysteine supplementation, GCY = Glucose, cysteine and yeast extract supplementation.

**Table S3.** Two-way ANOVA on soy whey volatiles before and after *B. lactis* BI-04 or B94 fermentation.

|                                      | LRI  | CN                          |                             |                             | G                           |                             |                             | GC                          |                             |                             | GCY                         |                             |                             |
|--------------------------------------|------|-----------------------------|-----------------------------|-----------------------------|-----------------------------|-----------------------------|-----------------------------|-----------------------------|-----------------------------|-----------------------------|-----------------------------|-----------------------------|-----------------------------|
|                                      |      | T 0 h†                      | T 48 h BI-04                | T 48 h B94                  | T 0 h†                      | T 48 h BI-04                | T 48 h B94                  | T 0 h†                      | T 48 h BI-04                | T 48 h B94                  | T 0 h†                      | T 48 h BI-04                | T 48 h B94                  |
|                                      |      | Peak Area x 10 <sup>6</sup> |
| <i>Acids</i>                         |      |                             |                             |                             |                             |                             |                             |                             |                             |                             |                             |                             |                             |
| Acetic acid <sup>*®</sup>            | 1446 | 11.47 ± 1b                  | 88.02 ± 20.67a              | 14.66 ± 5.16b               | 10.04 ± 3.25b               | 111.11 ± 24.52a             | 28.45 ± 3.29b               | 15.39 ± 3.83b               | 96.9 ± 11.05a               | 110.29 ± 25.9a              | 11.88 ± 3.94b               | 111.6 ± 2.69a               | 129.14 ± 38.27a             |
| Butanoic acid <sup>*®</sup>          | 1624 | 0.00 ± 0.00d                | 1.68 ± 0.50c                | 0.00 ± 0.00d                | 0.00 ± 0.00d                | 1.22 ± 0.22c                | 0.00 ± 0.00d                | 0.00 ± 0.00d                | 0.95 ± 0.27cd               | 1.25 ± 0.14c                | 0.00 ± 0.00d                | 5.22 ± 1.19b                | 6.21 ± 0.31a                |
| Isovaleric acid <sup>*®</sup>        | 1667 | 0.00 ± 0.00b                | 2.44 ± 0.65a                | 0.00 ± 0.00b                | 0.00 ± 0.00b                | 2.54 ± 0.32a                | 0.00 ± 0.00b                | 0.00 ± 0.00b                | 1.75 ± 0.7a                 | 1.74 ± 0.51a                | 0.00 ± 0.00b                | 2.16 ± 0.84a                | 2.74 ± 0.16a                |
| Pentanoic acid                       | 1720 | 0.93 ± 0.17ab               | 0.93 ± 0.07ab               | 0.92 ± 0.06ab               | 1.03 ± 0.23a                | 0.92 ± 0.09ab               | 0.99 ± 0.12ab               | 0.85 ± 0.06ab               | 0.96 ± 0.18ab               | 0.66 ± 0.15b                | 0.97 ± 0.2ab                | 0.92 ± 0.16ab               | 1.00 ± 0.17ab               |
| Hexanoic acid <sup>*</sup>           | 1843 | 39.75 ± 3.68abc             | 42.75 ± 6.21abc             | 43.43 ± 2.3abc              | 42.18 ± 7.05abc             | 47.4 ± 4.09a                | 48.34 ± 3.42a               | 32.66 ± 1.33c               | 45.8 ± 3.84ab               | 40.58 ± 5.11abc             | 34.65 ± 8.35bc              | 45.44 ± 2.18ab              | 42.94 ± 1.15abc             |
| Heptanoic acid                       | 1951 | 2.46 ± 0.14a                | 1.83 ± 0.36b                | 2.06 ± 0.17ab               | 1.98 ± 0.18ab               | 1.98 ± 0.13ab               | 2.13 ± 0.12ab               | 1.99 ± 0.28ab               | 2.1 ± 0.17ab                | 1.91 ± 0.18ab               | 1.91 ± 0.6ab                | 1.98 ± 0.08ab               | 1.99 ± 0.13ab               |
| Octanoic acid <sup>*</sup>           | 2058 | 4.87 ± 0.28abc              | 4.21 ± 1.31bc               | 4.28 ± 0.66bc               | 3.79 ± 0.64c                | 4.86 ± 0.65abc              | 5.14 ± 0.53abc              | 5.47 ± 1.36abc              | 6.08 ± 0.75abc              | 6.27 ± 0.84ab               | 5.07 ± 1.98abc              | 6.47 ± 1.01ab               | 6.70 ± 0.43a                |
| Nonanoic acid                        | 2159 | 7.22 ± 1.53a                | 5.38 ± 0.89a                | 5.04 ± 0.94a                | 5.68 ± 1.33a                | 5.54 ± 0.22a                | 6.21 ± 1.12a                | 5.81 ± 1.46a                | 5.28 ± 1.13a                | 5.48 ± 1.31a                | 5.11 ± 1.85a                | 5.51 ± 0.82a                | 5.34 ± 0.92a                |
| n-Decanoic acid <sup>*®</sup>        | 2274 | 0.74 ± 0.13bc               | 1.92 ± 0.56a                | 0.23 ± 0.07c                | 0.51 ± 0.22bc               | 1.93 ± 0.61a                | 0.31 ± 0.14bc               | 0.49 ± 0.15bc               | 0.8 ± 0.18bc                | 0.61 ± 0.12bc               | 2.15 ± 1.09a                | 1.18 ± 0.17abc              | 1.38 ± 0.51ab               |
| Benzoic acid <sup>*®</sup>           | 2425 | 2.54 ± 0.3a                 | 2.13 ± 0.62ab               | 2.05 ± 0.54ab               | 1.25 ± 0.42bc               | 2.71 ± 0.43a                | 2.24 ± 0.68ab               | 2.16 ± 0.8ab                | 2.41 ± 0.57ab               | 2.03 ± 0.32ab               | 0.6 ± 0.3c                  | 2.24 ± 0.15ab               | 2.45 ± 0.73ab               |
| <i>Alcohols</i>                      |      |                             |                             |                             |                             |                             |                             |                             |                             |                             |                             |                             |                             |
| 1-Penten-3-ol                        | 1158 | 2.00 ± 0.59a                | 1.91 ± 0.76a                | 3.01 ± 0.73a                | 2.42 ± 0.69a                | 2.00 ± 0.17a                | 2.14 ± 0.36a                | 2.88 ± 0.75a                | 2.51 ± 0.61a                | 2.42 ± 0.45a                | 3.10 ± 1.30a                | 1.97 ± 0.26a                | 1.94 ± 0.49a                |
| 1-Pentanol                           | 1247 | 7.06 ± 2.17a                | 7.3 ± 2.24a                 | 9.18 ± 2.14a                | 8.26 ± 2.68a                | 6.61 ± 1.43a                | 7.60 ± 1.24a                | 9.16 ± 1.89a                | 7.98 ± 1.14a                | 7.82 ± 1.22a                | 9.20 ± 2.02a                | 6.54 ± 1.40a                | 6.59 ± 1.26a                |
| 1-Hexanol <sup>+</sup>               | 1351 | 41.12 ± 10.21cd             | 85.40 ± 22.57a              | 69.89 ± 11.66abc            | 51.94 ± 13.01bcd            | 80.33 ± 17.23ab             | 57.18 ± 9.1abcd             | 57.82 ± 8.25abcd            | 71.64 ± 12.26abc            | 66.84 ± 9.86abcd            | 38.42 ± 4.84d               | 79.42 ± 13.84ab             | 61.46 ± 6.29abcd            |
| 1-Octen-3-ol <sup>*®</sup>           | 1444 | 26.01 ± 3.27d               | 67.18 ± 7.99abc             | 50.28 ± 9.1bcd              | 23.93 ± 3.27d               | 75.49 ± 15.42ab             | 36.30 ± 3.08cd              | 20.55 ± 6.62d               | 38.64 ± 6.95cd              | 52.43 ± 11.53bcd            | 23.07 ± 4.03d               | 93.85 ± 13.93a              | 75.42 ± 36.47ab             |
| 1-Octanol <sup>*®</sup>              | 1561 | 1.81 ± 0.96b                | 13.31 ± 2.09a               | 11.82 ± 2.31a               | 4.41 ± 5.25b                | 10.38 ± 1.42a               | 2.33 ± 1.02b                | 1.35 ± 0.45b                | 5.25 ± 0.62b                | 0.79 ± 0.25b                | 3.09 ± 2.08b                | 4.95 ± 0.72b                | 2.26 ± 0.67b                |
| <i>Aldehydes</i>                     |      |                             |                             |                             |                             |                             |                             |                             |                             |                             |                             |                             |                             |
| Hexanal <sup>*®</sup>                | 1082 | 28.49 ± 6.01bc              | 2.34 ± 0.68de               | 47.4 ± 11.44a               | 43.67 ± 8.74ab              | 2.14 ± 0.10e                | 57.98 ± 12.04a              | 14.38 ± 3.44cde             | 13.08 ± 1.98de              | 16.88 ± 3.42cde             | 17.59 ± 5.14cd              | 6.74 ± 0.38de               | 14.46 ± 4.49cde             |
| 2-Hexenal, (E)- <sup>*®</sup>        | 1232 | 1.44 ± 0.32ab               | 1.27 ± 0.32abcd             | 1.41 ± 0.18abc              | 0.96 ± 0.24cde              | 1.30 ± 0.13abcd             | 1.52 ± 0.11a                | 0.63 ± 0.15e                | 1.16 ± 0.12abcd             | 0.85 ± 0.21de               | 0.98 ± 0.19bcde             | 0.91 ± 0.15de               | 1.15 ± 0.08abcd             |
| 2-Heptenal <sup>*®</sup>             | 1331 | 1.42 ± 0.2bcd               | 0.40 ± 0.09d                | 2.21 ± 0.18b                | 1.46 ± 0.23bcd              | 0.35 ± 0.03d                | 1.66 ± 0.06bc               | 3.46 ± 0.93a                | 0.40 ± 0.03d                | 0.38 ± 0.03d                | 2.39 ± 1.32ab               | 0.49 ± 0.20cd               | 0.42 ± 0.05d                |
| 2-Octenal, (E)- <sup>*®</sup>        | 1430 | 0.79 ± 0.03b                | 0.33 ± 0.08c                | 0.81 ± 0.14ab               | 0.40 ± 0.16c                | 0.18 ± 0.06c                | 1.05 ± 0.13a                | 0.27 ± 0.10c                | 0.33 ± 0.09c                | 0.36 ± 0.08c                | 0.32 ± 0.06c                | 0.29 ± 0.12c                | 0.33 ± 0.09c                |
| Benzaldehyde <sup>*®</sup>           | 1519 | 11.65 ± 2.95def             | 16.36 ± 3.42bcde            | 22.71 ± 2.94ab              | 9.5 ± 2.97f                 | 19.92 ± 0.68abc             | 23.09 ± 3.69a               | 11.44 ± 2def                | 16.40 ± 1.07bcde            | 17.04 ± 1.33abcd            | 9.82 ± 4.79ef               | 13.88 ± 0.74cdef            | 15.56 ± 2.03cdef            |
| <i>Ketones</i>                       |      |                             |                             |                             |                             |                             |                             |                             |                             |                             |                             |                             |                             |
| 2,3-Butanedione <sup>*®</sup>        | 978  | 0.00 ± 0.00c                | 17.02 ± 4.15a               | 0.00 ± 0.00c                | 0.00 ± 0.00c                | 11.25 ± 1.27b               | 0.00 ± 0.00c                | 0.00 ± 0.00c                | 9.8 ± 2.35b                 | 9.44 ± 1.26b                | 0.00 ± 0.00c                | 8.38 ± 1.35b                | 8.58 ± 1.45b                |
| 2-Heptanone <sup>+</sup>             | 1182 | 4.98 ± 1.01abc              | 6.75 ± 1.52ab               | 6.85 ± 1.26a                | 3.95 ± 0.54c                | 6.77 ± 0.84ab               | 7.00 ± 0.57a                | 5.22 ± 0.17abc              | 6.95 ± 0.5a                 | 6.97 ± 0.91a                | 4.47 ± 1.48bc               | 6.83 ± 1.05ab               | 6.80 ± 0.67ab               |
| Damascenone <sup>*®</sup>            | 1821 | 34.04 ± 3.21a               | 24.04 ± 3.07b               | 26.3 ± 3.96ab               | 26.59 ± 4.81ab              | 23.61 ± 2.41b               | 29.11 ± 3.67ab              | 11.8 ± 4.03c                | 6.21 ± 0.6c                 | 6.07 ± 1.61c                | 12.07 ± 4.5c                | 7.16 ± 0.59c                | 8.37 ± 1.17c                |
| <i>Sulfur compounds</i>              |      |                             |                             |                             |                             |                             |                             |                             |                             |                             |                             |                             |                             |
| Hydrogen sulfide <sup>*®</sup>       | 745  | 0.00 ± 0.00c                | 0.00 ± 0.00c                | 0 ± 0c                      | 0.00 ± 0.00c                | 0.00 ± 0.00c                | 0 ± 0c                      | 0.00 ± 0.00c                | 1.51 ± 0.18b                | 1.85 ± 0.42ab               | 0.00 ± 0.00c                | 2.15 ± 0.39a                | 2.11 ± 0.48a                |
| Thiophene-3-methyl <sup>*®</sup>     | 1090 | 0.00 ± 0.00c                | 0.00 ± 0.00c                | 0 ± 0c                      | 0.00 ± 0.00c                | 0.00 ± 0.00c                | 0 ± 0c                      | 0.00 ± 0.00c                | 2.42 ± 0.24a                | 2.52 ± 0.17a                | 0.00 ± 0.00c                | 1.84 ± 0.27b                | 2.26 ± 0.17a                |
| <i>Furans</i>                        |      |                             |                             |                             |                             |                             |                             |                             |                             |                             |                             |                             |                             |
| 2-Pentyl furan <sup>+</sup>          | 1216 | 3.30 ± 0.42a                | 2.76 ± 0.65a                | 2.81 ± 0.96a                | 2.70 ± 0.69a                | 2.60 ± 0.45a                | 2.91 ± 0.91a                | 3.32 ± 0.97a                | 2.20 ± 0.63a                | 1.91 ± 0.36a                | 3.05 ± 0.79a                | 1.94 ± 0.30a                | 1.89 ± 0.50a                |
| <i>Total volatiles</i> <sup>*®</sup> |      | 233.97 ± 24.67d             | 397.56 ± 21.77ab            | 327.26 ± 22.51c             | 246.54 ± 18.2d              | 423.04 ± 29.48a             | 323.6 ± 17.82c              | 207.01 ± 12.84d             | 349.39 ± 28.58bc            | 365.26 ± 27.15abc           | 189.82 ± 23.4d              | 419.94 ± 27.69a             | 409.37 ± 49.89ab            |

LRI = Linear retention index

a-f, Statistical analysis using ANOVA at 95% confidence interval with Tukey’s post hoc test across 8 treatments if interaction effect is significant.

<sup>\*</sup>Depicts a significant (*P*<0.05) bifidobacterial effect.

<sup>\*</sup>Depicts a significant (*P*<0.05) supplementation effect.

<sup>®</sup>Depicts a significant (*P*<0.05) interaction effect.

<sup>†</sup>T 0 h, data taken from Tindjau et al. (2023), as they were part of the same experiment.

CN = unsupplemented control, G = glucose supplementation, GC = Glucose and cysteine supplementation, GCY = Glucose, cysteine and yeast extract supplementation.

**Table S4.** Relative peak area of soy whey volatiles before and after *B. lactis* BI-04 or B94 fermentation.

|                         | LRI  | CN                 |                    |                    | G                  |                    |                    | GC                 |                    |                    | GCY                |                    |                    |
|-------------------------|------|--------------------|--------------------|--------------------|--------------------|--------------------|--------------------|--------------------|--------------------|--------------------|--------------------|--------------------|--------------------|
|                         |      | T 0 h†             | T 48 h BI-04       | T 48 h B94         | T 0 h†             | T 48 h BI-04       | T 48 h B94         | T 0 h†             | T 48 h BI-04       | T 48 h B94         | T 0 h†             | T 48 h BI-04       | T 48 h B94         |
|                         |      | Relative Peak Area |
| <i>Acids</i>            |      |                    |                    |                    |                    |                    |                    |                    |                    |                    |                    |                    |                    |
| Acetic acid             | 1446 | 4.90               | 22.14              | 4.48               | 4.07               | 26.26              | 8.79               | 7.43               | 27.73              | 30.19              | 6.25               | 26.58              | 31.55              |
| Butanoic acid           | 1624 | 0.00               | 0.42               | 0.00               | 0.00               | 0.29               | 0.00               | 0.00               | 0.27               | 0.34               | 0.00               | 1.24               | 1.52               |
| Isovaleric acid         | 1667 | 0.00               | 0.61               | 0.00               | 0.00               | 0.60               | 0.00               | 0.00               | 0.50               | 0.47               | 0.00               | 0.51               | 0.67               |
| Pentanoic acid          | 1720 | 0.40               | 0.23               | 0.28               | 0.41               | 0.22               | 0.30               | 0.41               | 0.27               | 0.18               | 0.51               | 0.22               | 0.24               |
| Hexanoic acid           | 1843 | 16.99              | 10.75              | 13.27              | 17.11              | 11.20              | 14.94              | 15.77              | 13.11              | 11.11              | 18.25              | 10.82              | 10.49              |
| Heptanoic acid          | 1951 | 1.05               | 0.46               | 0.63               | 0.80               | 0.47               | 0.66               | 0.96               | 0.60               | 0.52               | 1.00               | 0.47               | 0.48               |
| Octanoic acid           | 2058 | 2.08               | 1.06               | 1.31               | 1.54               | 1.15               | 1.59               | 2.64               | 1.74               | 1.72               | 2.67               | 1.54               | 1.64               |
| Nonanoic acid           | 2159 | 3.08               | 1.35               | 1.54               | 2.30               | 1.31               | 1.92               | 2.80               | 1.51               | 1.50               | 2.69               | 1.31               | 1.30               |
| n-Decanoic acid         | 2274 | 0.31               | 0.48               | 0.07               | 0.20               | 0.46               | 0.10               | 0.23               | 0.23               | 0.17               | 1.13               | 0.28               | 0.34               |
| Benzoic acid            | 2425 | 1.08               | 0.53               | 0.62               | 0.51               | 0.64               | 0.69               | 1.04               | 0.69               | 0.55               | 0.31               | 0.53               | 0.60               |
| <i>Alcohols</i>         |      |                    |                    |                    |                    |                    |                    |                    |                    |                    |                    |                    |                    |
| 1-Penten-3-ol           | 1158 | 0.85               | 0.48               | 0.92               | 0.98               | 0.47               | 0.66               | 1.39               | 0.72               | 0.66               | 1.63               | 0.47               | 0.47               |
| 1-Pentanol              | 1247 | 3.02               | 1.84               | 2.80               | 3.35               | 1.56               | 2.35               | 4.42               | 2.28               | 2.14               | 4.84               | 1.56               | 1.61               |
| 1-Hexanol               | 1351 | 17.57              | 21.48              | 21.36              | 21.07              | 18.99              | 17.67              | 27.93              | 20.50              | 18.30              | 20.24              | 18.91              | 15.01              |
| 1-Octen-3-ol            | 1444 | 11.12              | 16.90              | 15.36              | 9.70               | 17.84              | 11.22              | 9.93               | 11.06              | 14.35              | 12.15              | 22.35              | 18.42              |
| 1-Octanol               | 1561 | 0.77               | 3.35               | 3.61               | 1.79               | 2.45               | 0.72               | 0.65               | 1.50               | 0.22               | 1.62               | 1.18               | 0.55               |
| <i>Aldehydes</i>        |      |                    |                    |                    |                    |                    |                    |                    |                    |                    |                    |                    |                    |
| Hexanal                 | 1082 | 12.17              | 0.59               | 14.48              | 17.71              | 0.50               | 17.91              | 6.95               | 3.74               | 4.62               | 9.26               | 1.60               | 3.53               |
| 2-Hexenal, (E)-         | 1232 | 0.61               | 0.32               | 0.43               | 0.39               | 0.31               | 0.47               | 0.30               | 0.33               | 0.23               | 0.51               | 0.22               | 0.28               |
| 2-Heptenal              | 1331 | 0.60               | 0.10               | 0.67               | 0.59               | 0.08               | 0.51               | 1.67               | 0.11               | 0.10               | 1.26               | 0.12               | 0.10               |
| 2-Octenal, (E)-         | 1430 | 0.33               | 0.08               | 0.25               | 0.16               | 0.04               | 0.32               | 0.13               | 0.09               | 0.10               | 0.17               | 0.07               | 0.08               |
| Benzaldehyde            | 1519 | 4.98               | 4.11               | 6.94               | 3.85               | 4.71               | 7.13               | 5.52               | 4.69               | 4.66               | 5.17               | 3.30               | 3.80               |
| <i>Ketones</i>          |      |                    |                    |                    |                    |                    |                    |                    |                    |                    |                    |                    |                    |
| 2,3-Butanedione         | 978  | 0.00               | 4.28               | 0.00               | 0.00               | 2.66               | 0.00               | 0.00               | 2.80               | 2.58               | 0.00               | 1.99               | 2.10               |
| 2-Heptanone             | 1182 | 2.13               | 1.70               | 2.09               | 1.60               | 1.60               | 2.16               | 2.52               | 1.99               | 1.91               | 2.35               | 1.63               | 1.66               |
| Damascenone             | 1821 | 14.55              | 6.05               | 8.03               | 10.78              | 5.58               | 8.99               | 5.70               | 1.78               | 1.66               | 6.36               | 1.70               | 2.04               |
| <i>Sulfur compounds</i> |      |                    |                    |                    |                    |                    |                    |                    |                    |                    |                    |                    |                    |
| Hydrogen sulfide        | 745  | 0.00               | 0.00               | 0.00               | 0.00               | 0.00               | 0.00               | 0.00               | 0.43               | 0.50               | 0.00               | 0.51               | 0.51               |
| Thiophene-3-methyl      | 1090 | 0.00               | 0.00               | 0.00               | 0.00               | 0.00               | 0.00               | 0.00               | 0.69               | 0.69               | 0.00               | 0.44               | 0.55               |
| <i>Furans</i>           |      |                    |                    |                    |                    |                    |                    |                    |                    |                    |                    |                    |                    |
| 2-Pentyl furan          | 1216 | 1.41               | 0.69               | 0.86               | 1.09               | 0.61               | 0.90               | 1.60               | 0.63               | 0.52               | 1.61               | 0.46               | 0.46               |
| <i>Total volatiles</i>  |      | 100.00             | 100.00             | 100.00             | 100.00             | 100.00             | 100.00             | 100.00             | 100.00             | 100.00             | 100.00             | 100.00             | 100.00             |

LRI = Linear retention index

<sup>‡</sup>T 0 h, data taken from Tindjau et al. (2023) [19], as they were part of the same experiment.

CN = unsupplemented control, G = glucose supplementation, GC = Glucose and cysteine supplementation, GCY = Glucose, cysteine and yeast extract supplementation.
